# Supplementary material for: High-Fat Diet Augments the Effect of Alcohol on Skeletal Muscle Mitochondrial Dysfunction in Mice
Source: MDPI journal article supplement (doi:10.3390/nu14051016), 2022-02-28
Supplement: s1 [file s1]

**Supplementary Material**

**Supplemental Table S1.** Dietary Ingredient Breakdown

**Supplemental Table S2.** Average Alcohol Intake

**Supplemental Table S3.** Body Weights

**Supplemental Table S4.** Muscle Weights

## Supplemental Tables

**Supplemental Table S1. Dietary Ingredient Breakdown**

| Diet Name                | EtOH-free HF | LF + EtOH | HF + EtOH |
|--------------------------|--------------|-----------|-----------|
| Ingredient:              | g/Liter      | g/Liter   | g/Liter   |
| Casein (80 Mesh)         | 41.40        | 41.40     | 41.40     |
| DL-Methionine            | 0.30         | 0.30      | 0.30      |
| L-Cystine                | 0.50         | 0.50      | 0.50      |
| Cellulose                | 10.00        | 10.00     | 10.00     |
| Maltose Dextrin          | 115.20       | 93.56     | 35.56     |
| Corn Oil                 | 8.50         | 2.50      | 8.50      |
| Olive Oil                | 28.40        | 8.40      | 28.40     |
| Safflower Oil            | 2.70         | 2.70      | 2.70      |
| Mineral Mix <sup>1</sup> | 8.75         | 8.75      | 8.75      |
| Vitamin Mix <sup>2</sup> | 2.50         | 2.50      | 2.50      |
| Choline Bitartrate       | 0.53         | 0.53      | 0.53      |
| Xanthan Gum              | 3.00         | 3.00      | 3.00      |
| Alcohol (32% kcal)       | 0            | 48.10     | 48.10     |

<sup>1</sup>Mineral Mix: Ca (5,000 g/kg), P (1,561 g/kg), K (3,600 g/kg), Na (1,019 g/kg), Cl (1,571 g/kg), S (300 g/kg), Mg (507 g/kg), Fe (35 g/kg), Cu (6 g/kg), Mn (10 g/kg), Zn (30 g/kg), Cr (1 g/kg), I (0.2 g/kg), Se (0.15 g/kg), F (1 g/kg), B (0.5 g/kg), Mo (0.15 g/kg), Si (5 g/kg), Ni (0.5 g/kg), Li (0.1 g/kg), V (0.1 g/kg). <sup>2</sup>Vitamin Mix: Niacin (3 g/kg), Calcium Pantothenate (1.6 g/kg), Pyridoxine HCl (0.7 g/kg), Thiamine HCl (0.6 g/kg), Riboflavin (0.6 g/kg), Folic Acid (0.2 g/kg), Biotin (0.02 g/kg), Vitamin E Acetate (500 IU/g, 15 g/kg), Vitamin B12 (0.1%, 2.5 g/kg), Vitamin A Palmitate (500,000 IU/g, 0.8 g/kg), Vitamin D3 (400,000 IU/g, 0.25 g/kg), Vitamin K1/Dextrose Mix (10 mg/g, 7.50 g/kg), Sucrose (967.23 g/kg).

**Supplemental Table S2. Average Alcohol Intake**

|                 | EtOH-free HF | LF + EtOH  | HF + EtOH  |
|-----------------|--------------|------------|------------|
| Overall average | 0            | 18.6 ± 4.6 | 17.6 ± 4.3 |

**Supplemental Table S3. Body Weight**

| Body Weight (g) | EtOH-free HF | LF + EtOH    | HF + EtOH    |
|-----------------|--------------|--------------|--------------|
| Overall average | 26.24 ± 4.96 | 27.48 ± 2.79 | 27.41 ± 2.83 |

Supplemental Table S4. Muscle Weight

| Gastrocnemius Weight (mg tissue/gram BW) |              |             |             |
|------------------------------------------|--------------|-------------|-------------|
|                                          | EtOH-free HF | LF + EtOH   | HF + EtOH   |
| Overall average                          | 4.64 ± 0.55  | 4.45 ± 0.29 | 4.54 ± 0.49 |
